# Supplementary material for: Inhibition of PIKfyve kinase prevents infection by Zaire ebolavirus and SARS-CoV-2
Source: PubMed Central journal article supplement (PMC7456157; doi:10.1073/pnas.2007837117), 2020-08-06
Supplement: pnas.2007837117.sapp.pdf [file pnas.2007837117.sapp.pdf]

**Video 1. Apilimod doesn't inhibit VSV-MeGFP entry.** Maximal Z-projection from four optical sections separated 0.25  $\mu\text{M}$  apart of SVG-A cells gene-edited to express TagRFP-Rab5c imaged by spinning disc confocal microscopy every 3 seconds for 3 min. Cells were infected with VSV-MeGFP (MOI = 4) in the presence of CHX with or without 5  $\mu\text{M}$  Apilimod and imaged  $\sim$  3-4 h post-infection.

**Video 2. Apilimod inhibits VSV-MeGFP-ZEBOV entry.** Maximal Z-projection from four optical sections separated 0.25  $\mu\text{M}$  apart of SVG-A cells gene-edited to express TagRFP-Rab5c imaged by spinning disc confocal microscopy every 3 seconds for 3 min. Cells were infected with VSV-MeGFP-ZEBOV (MOI = 3) in the presence of CHX with or without 5  $\mu\text{M}$  Apilimod and imaged  $\sim$  6-7 h post infection.

**Video 3. Apilimod inhibits VSV-MeGFP-ZEBOV entry.** Maximal Z-projection from four optical sections separated 0.25  $\mu\text{M}$  apart of SVG-A cells gene-edited to express NPC1-Halo imaged by spinning disc confocal microscopy every 3 seconds for 3 min. Cells were infected with VSV-MeGFP-ZEBOV (MOI = 3) with or without 5  $\mu\text{M}$  Apilimod and imaged  $\sim$  5 h post infection.
